# Supplementary material for: Questionable research practices in student final theses – Prevalence, attitudes, and the role of the supervisor’s perceived attitudes
Source: PubMed Central journal article supplement (PMC6117074; doi:10.1371/journal.pone.0203470), 2018-08-30

Bar charts for descriptive variables.

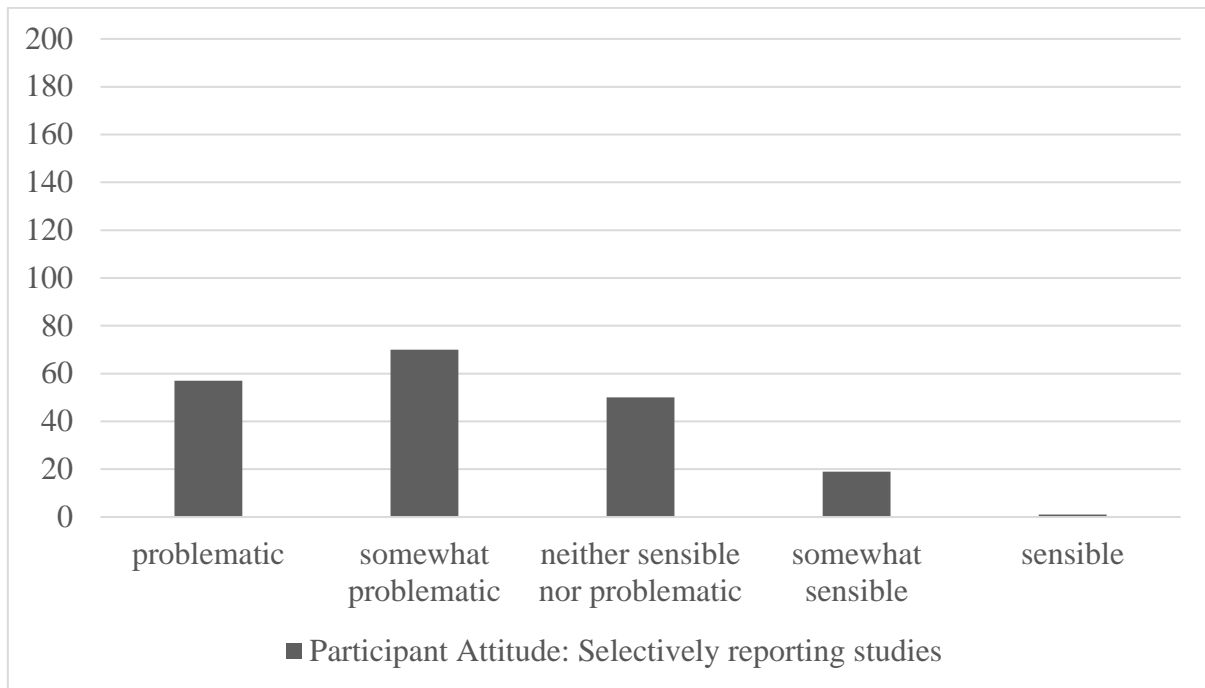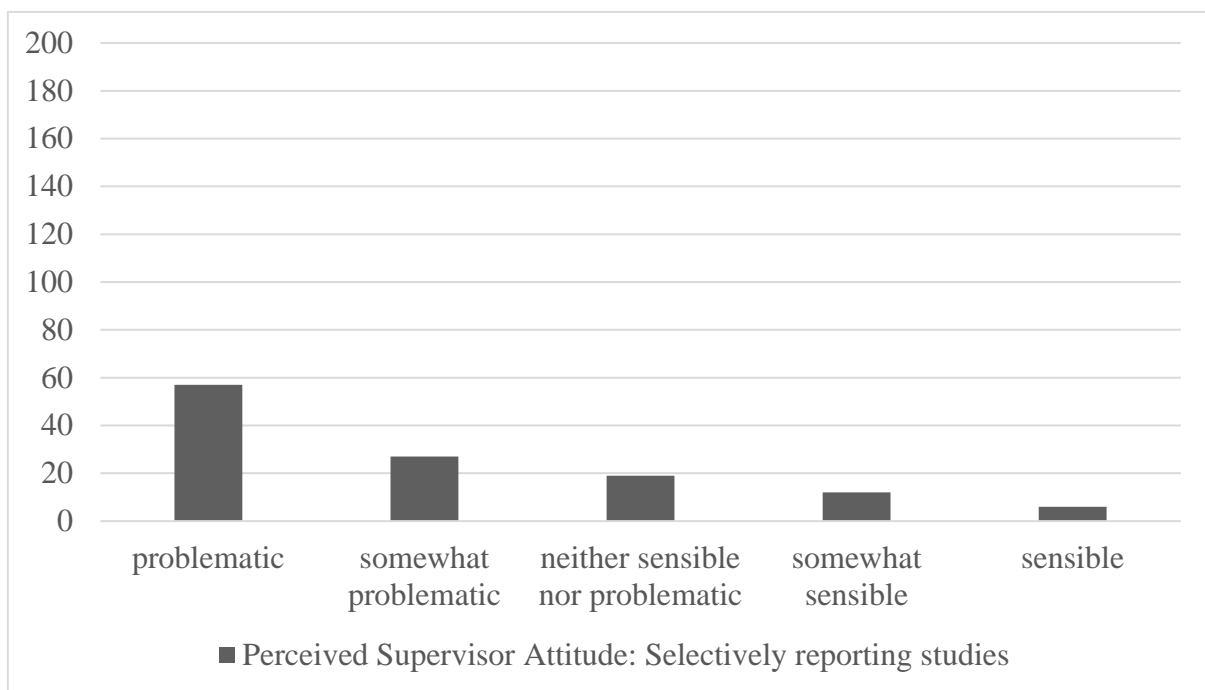

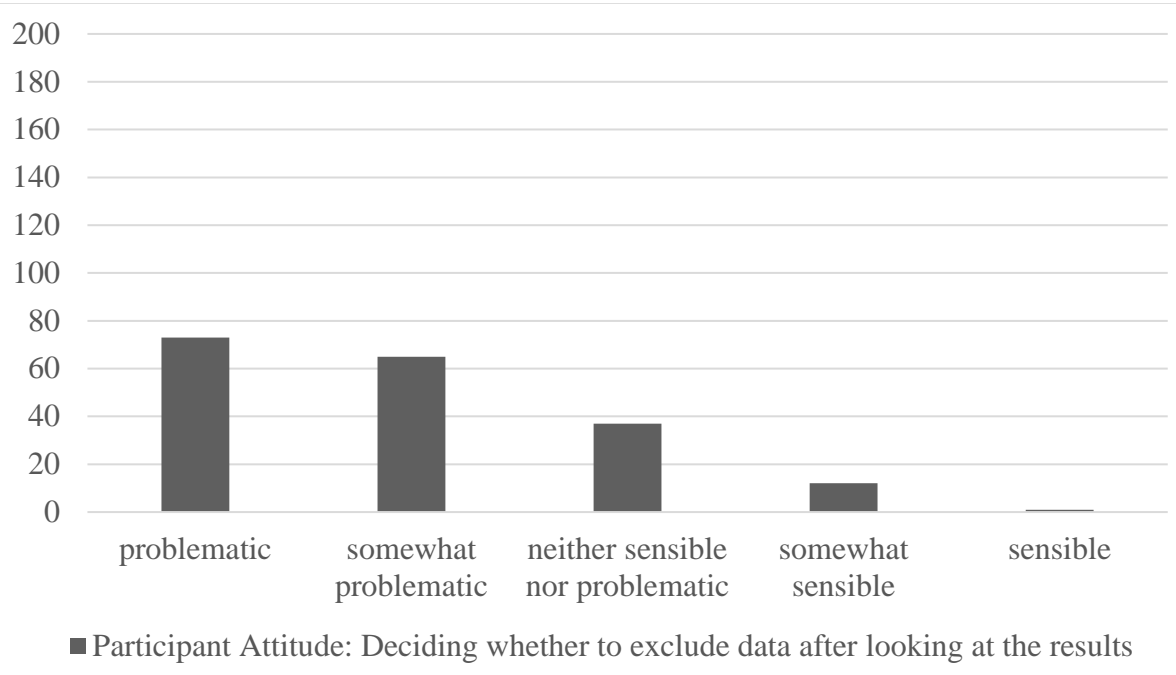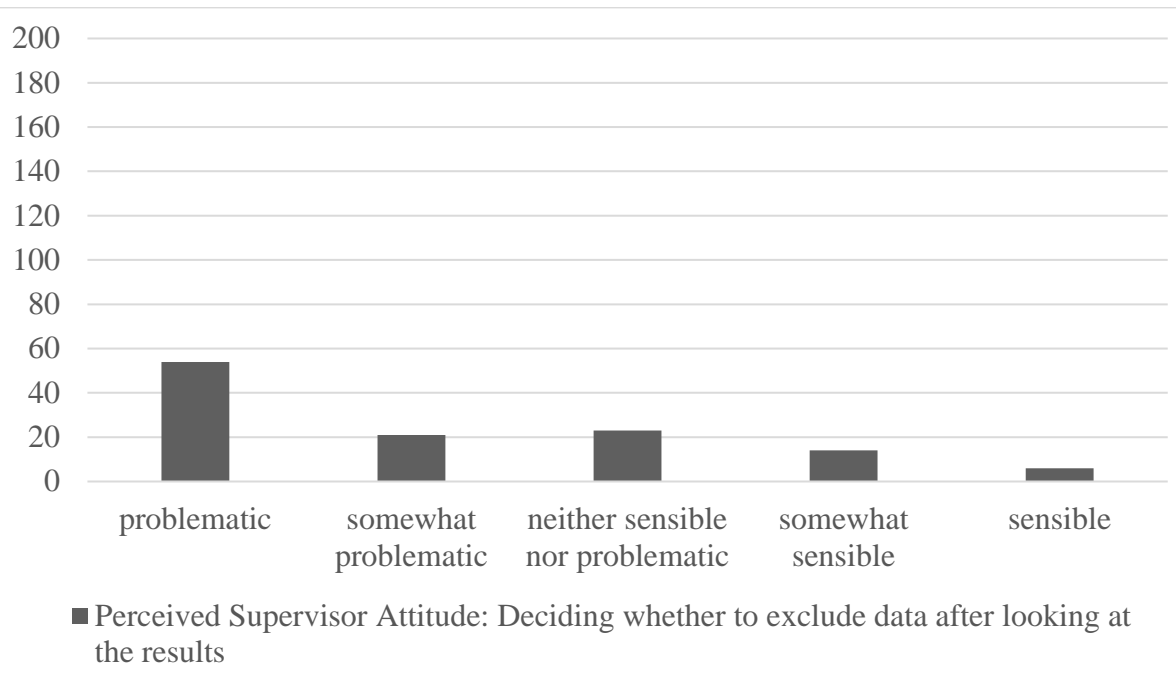

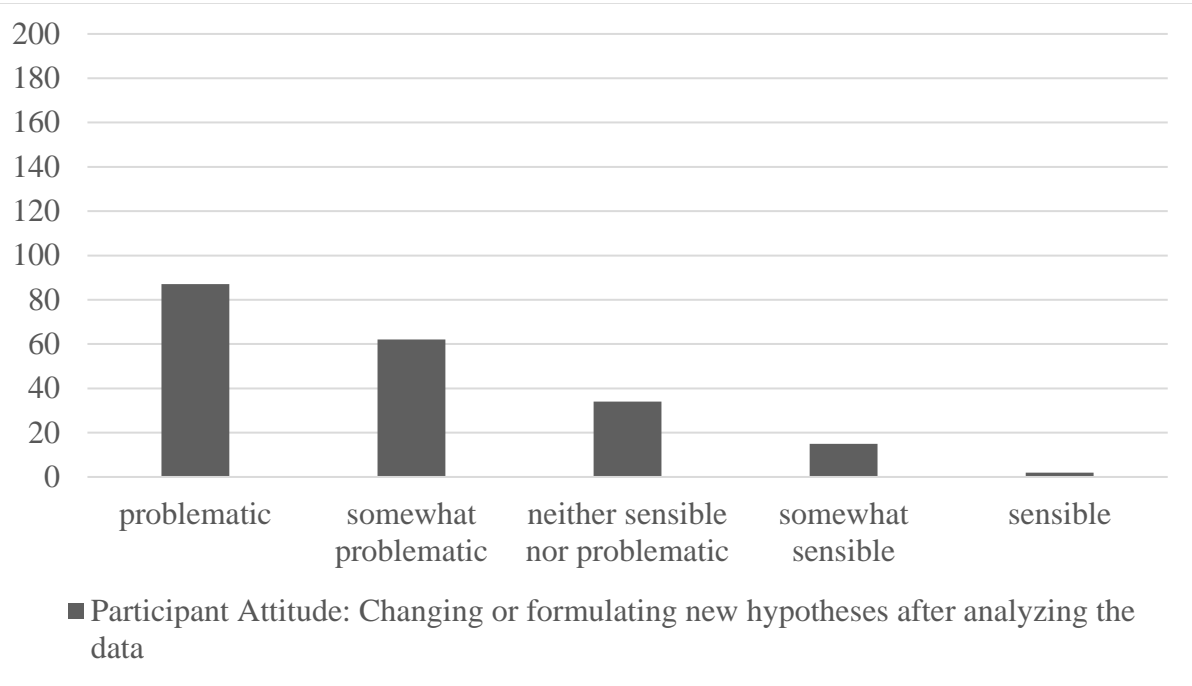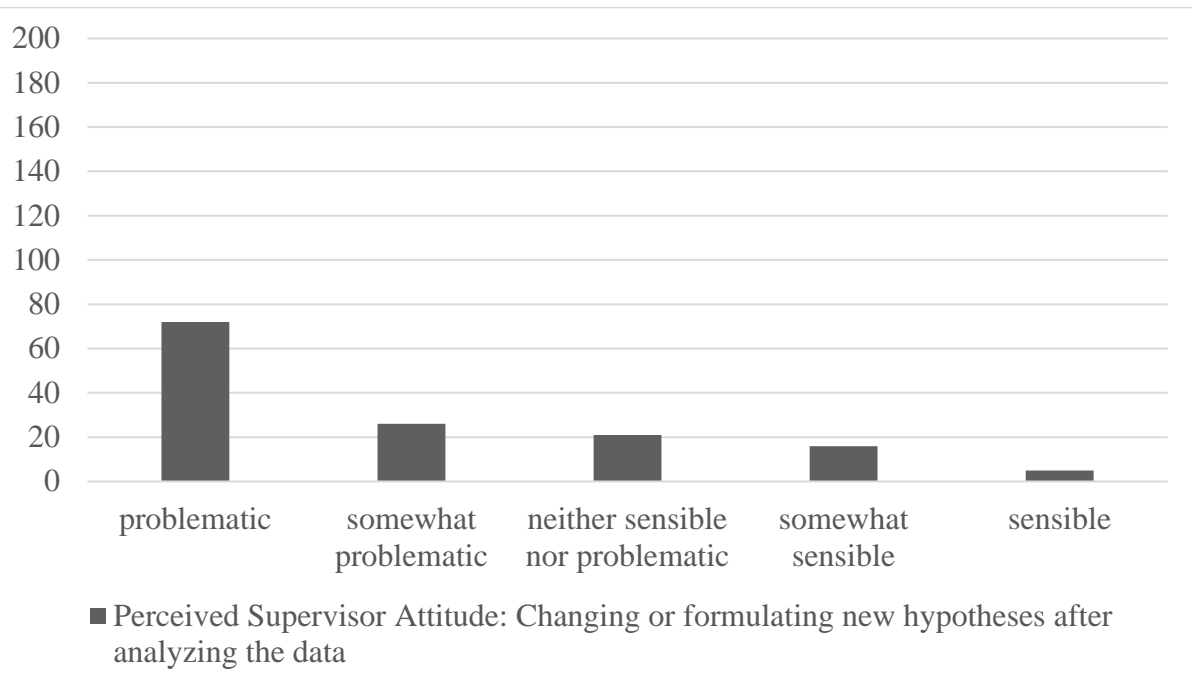

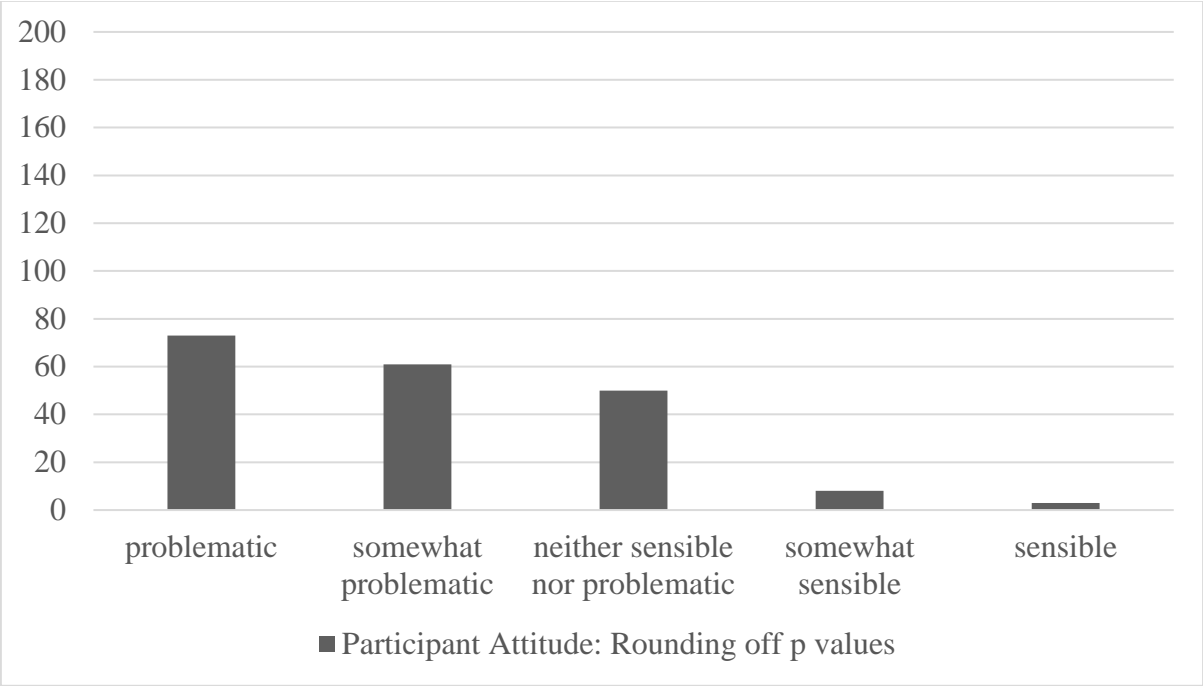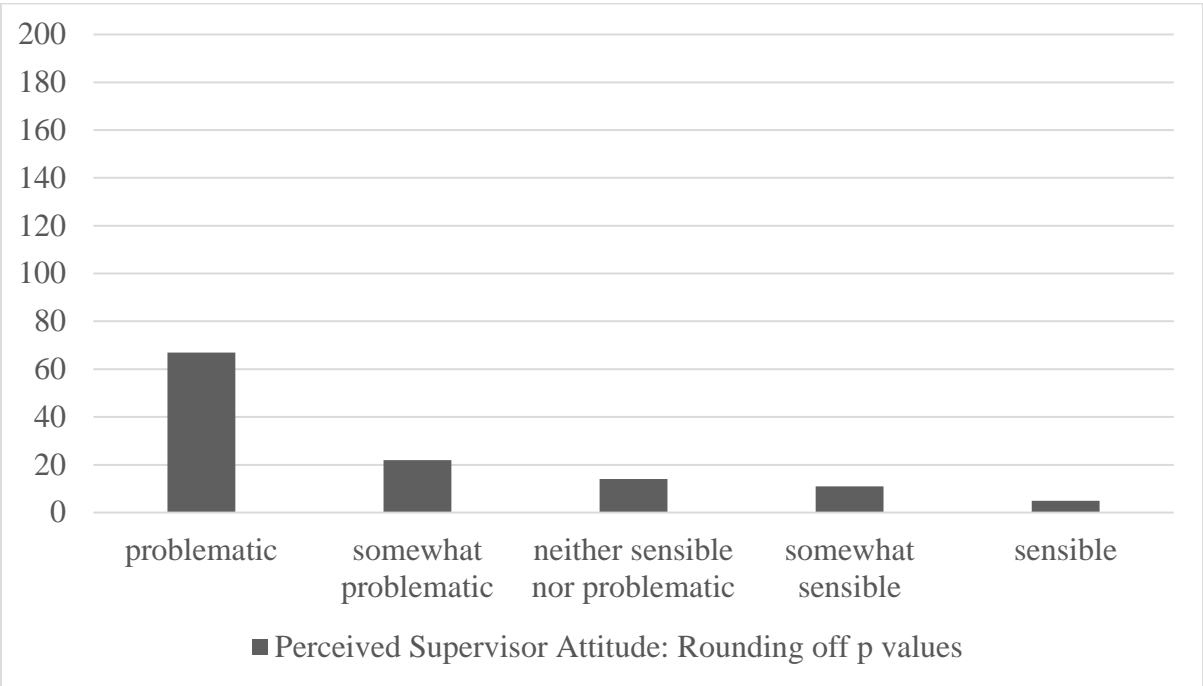

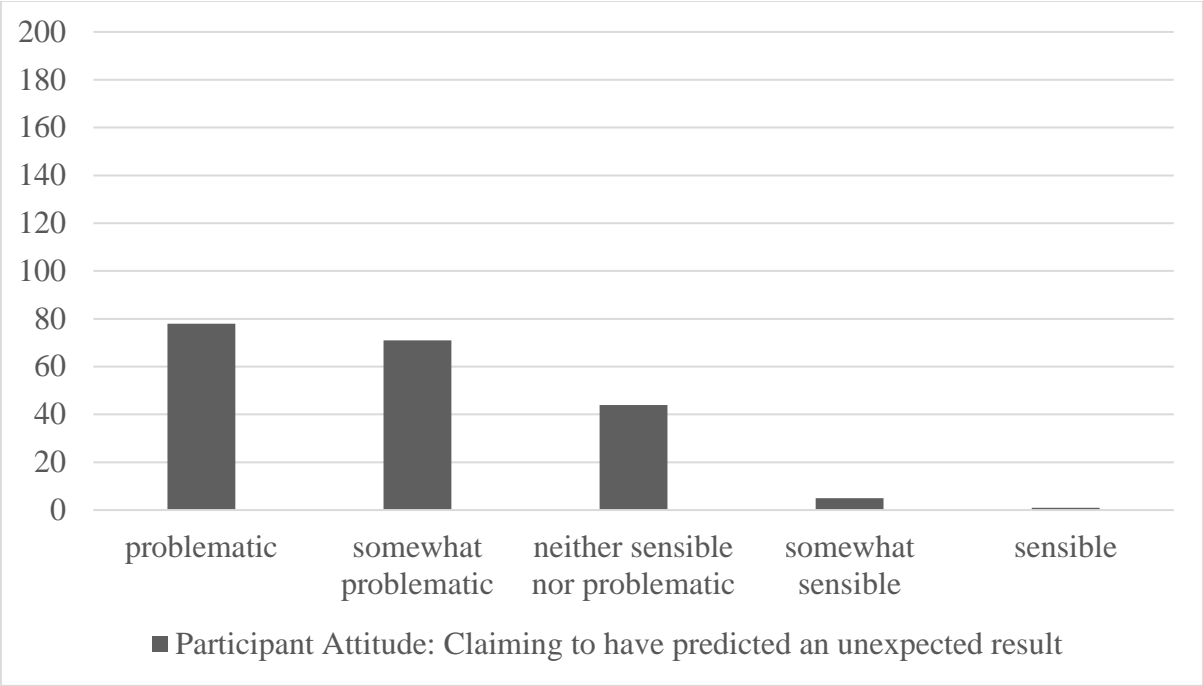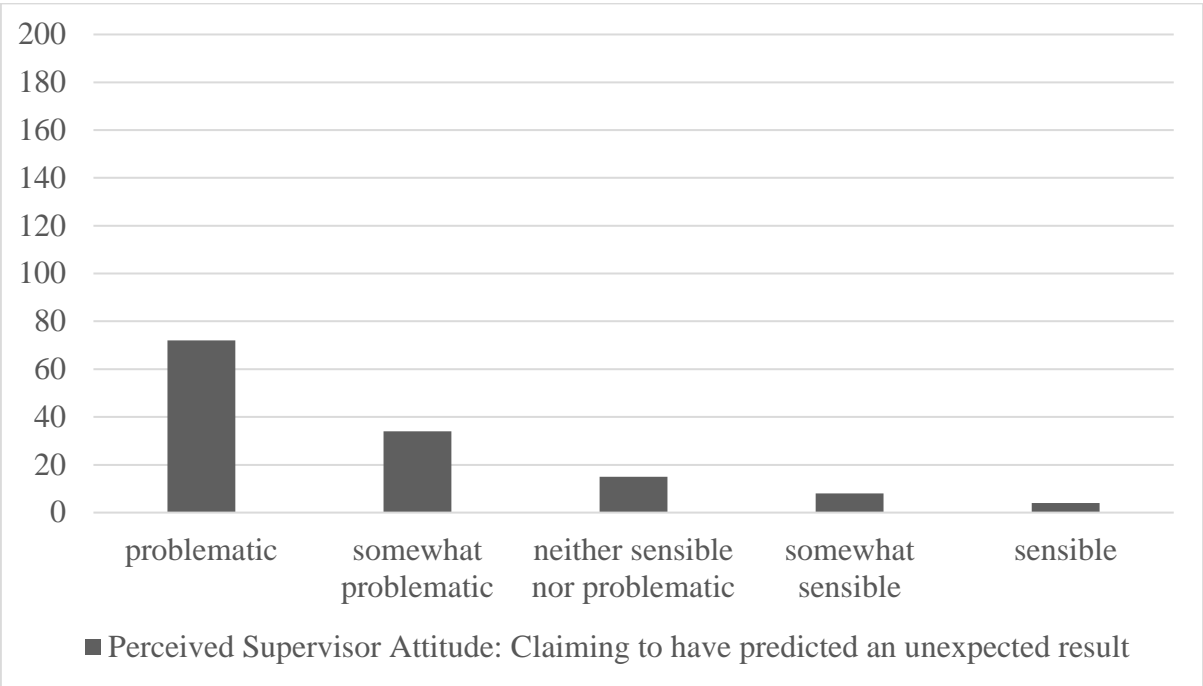

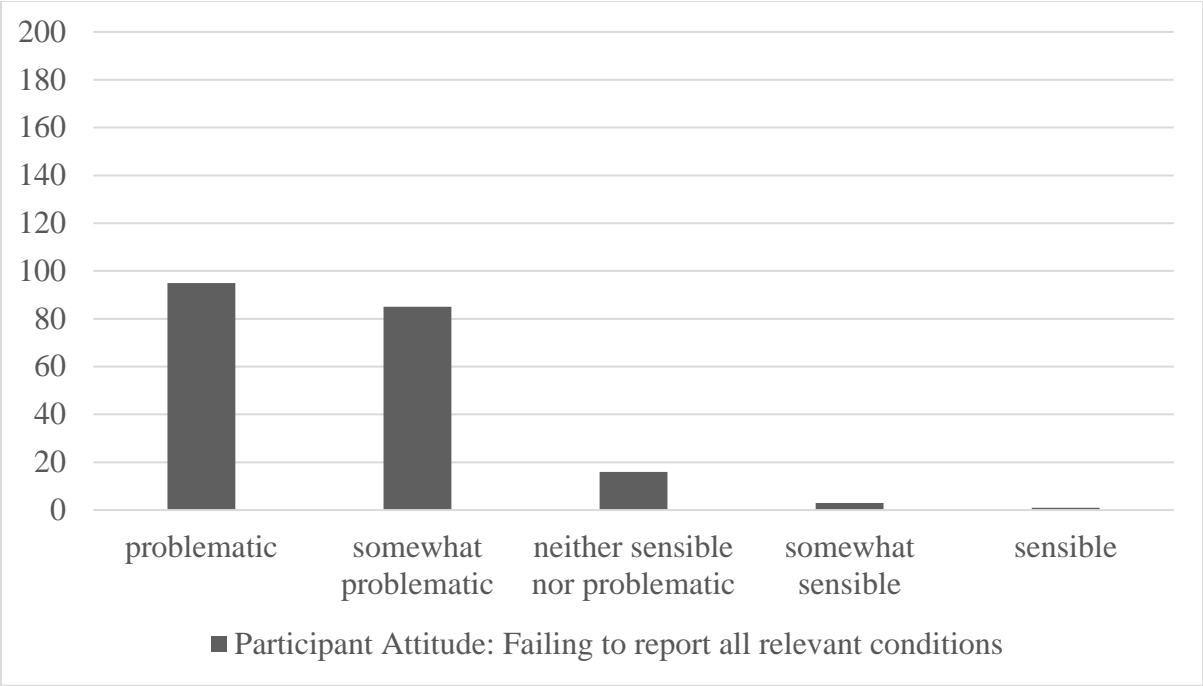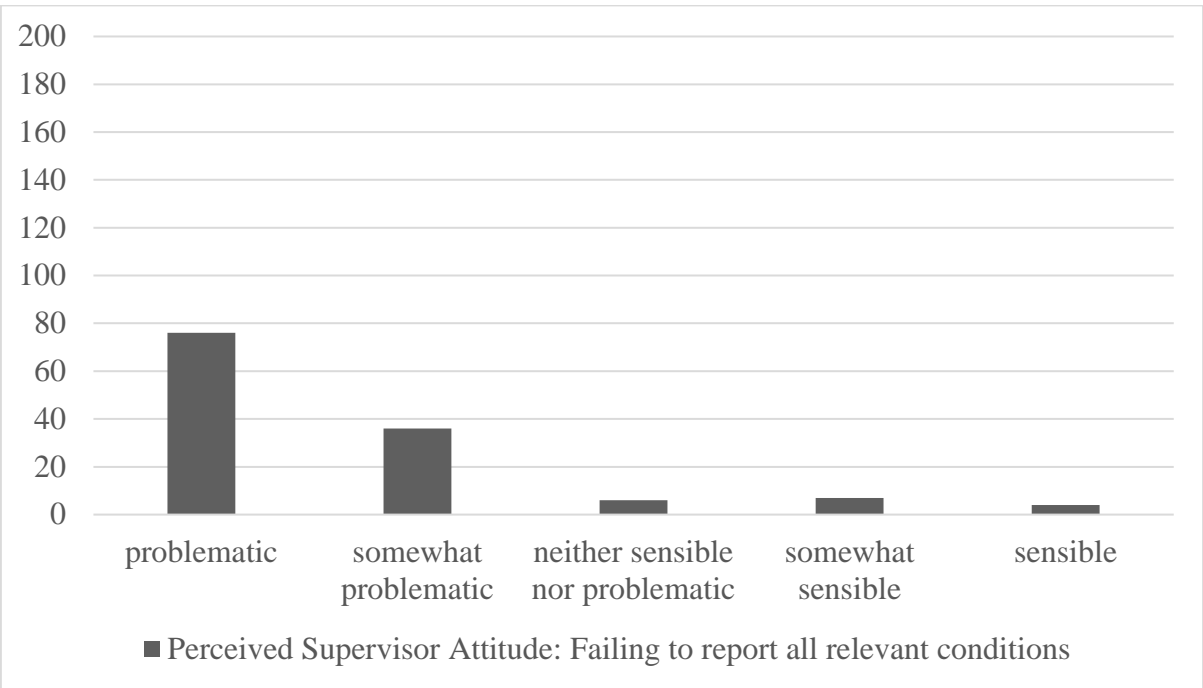

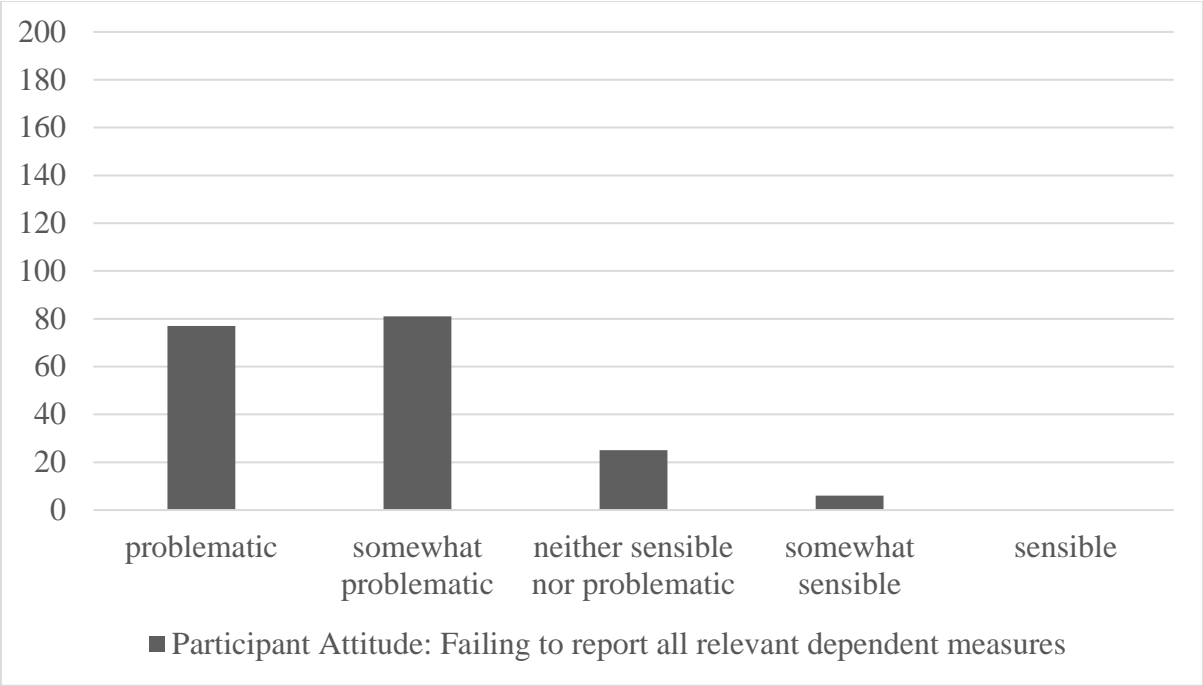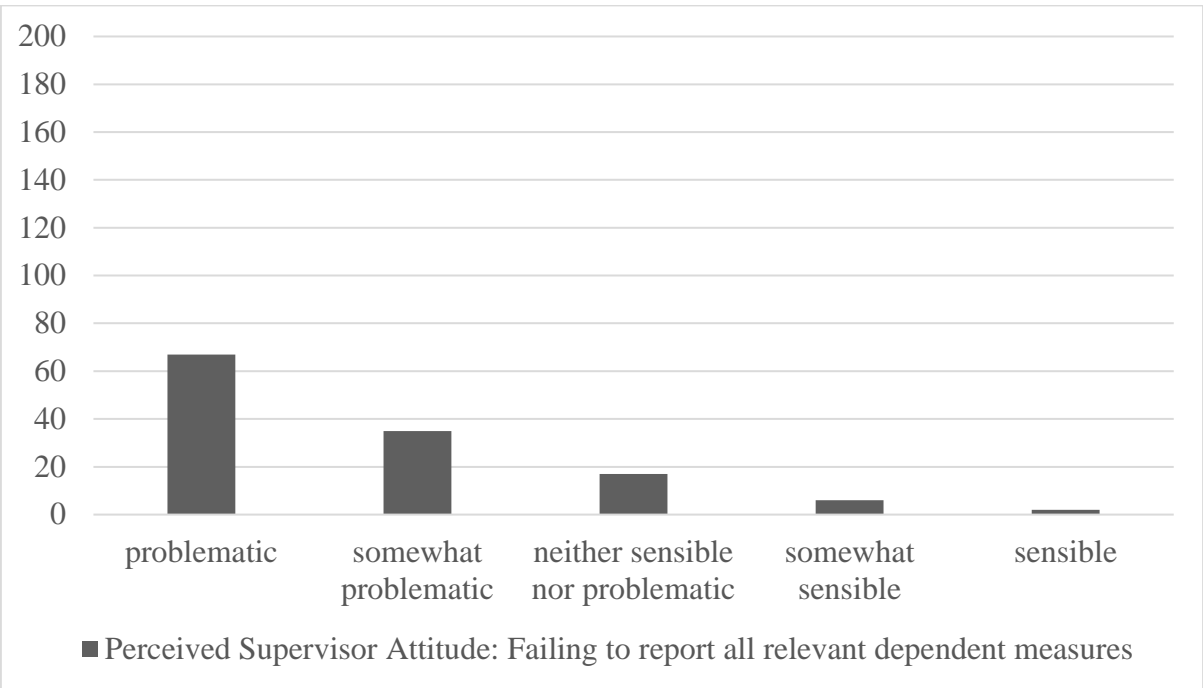

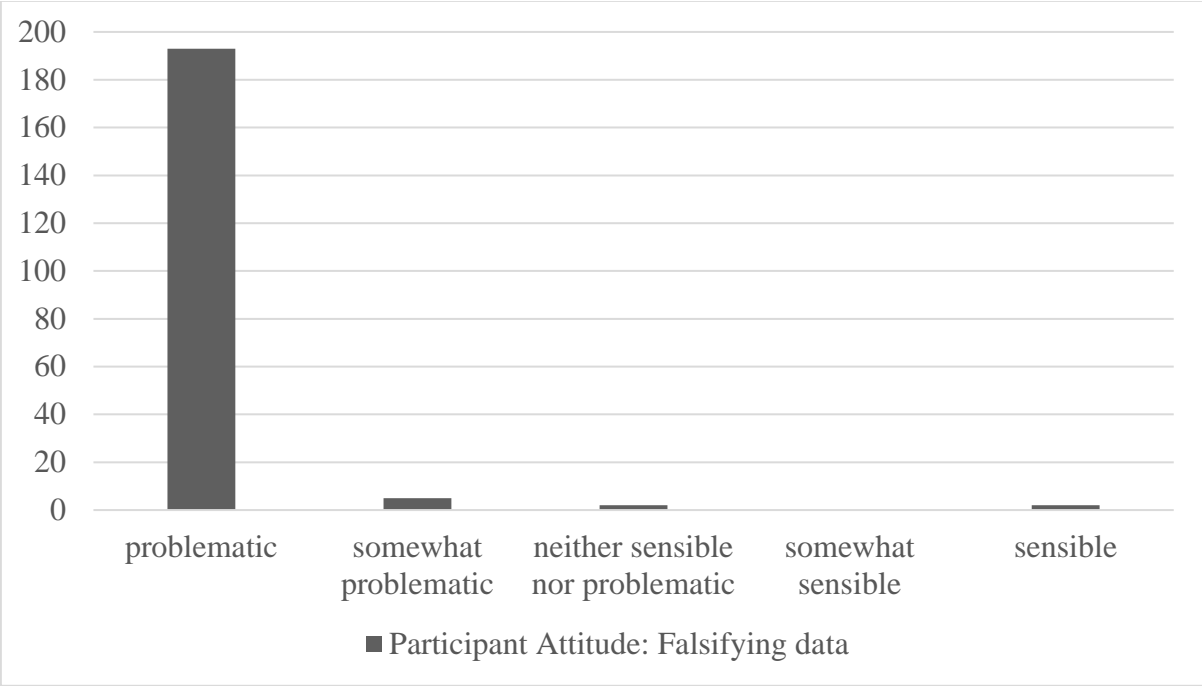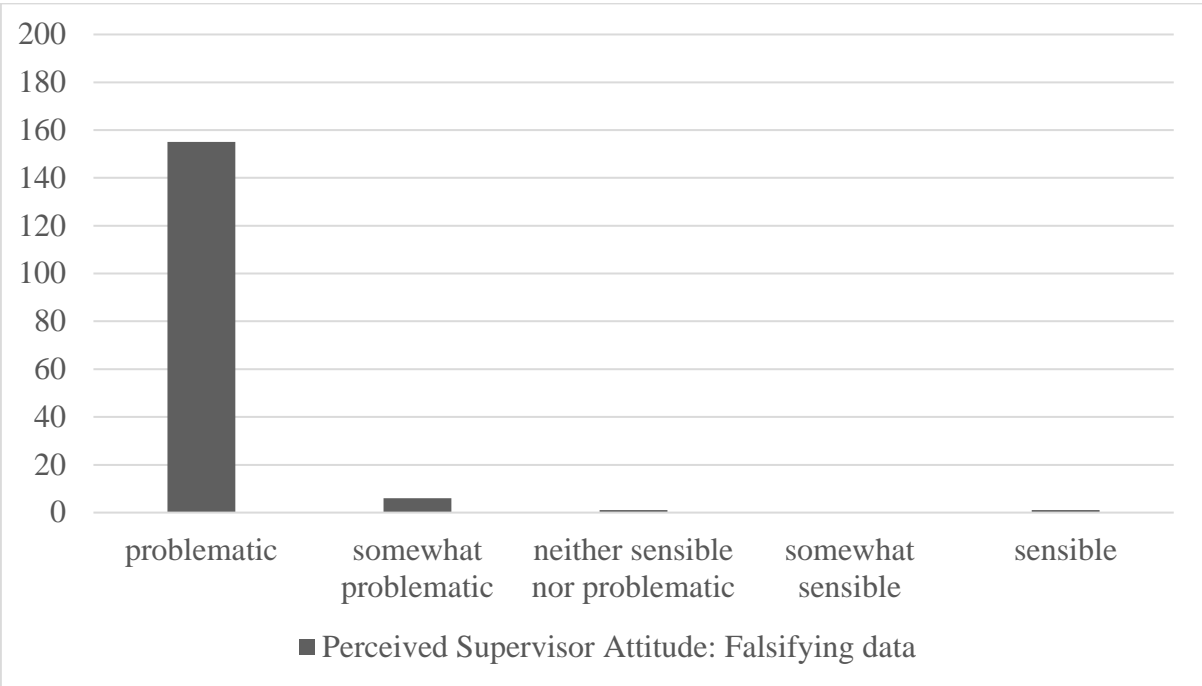



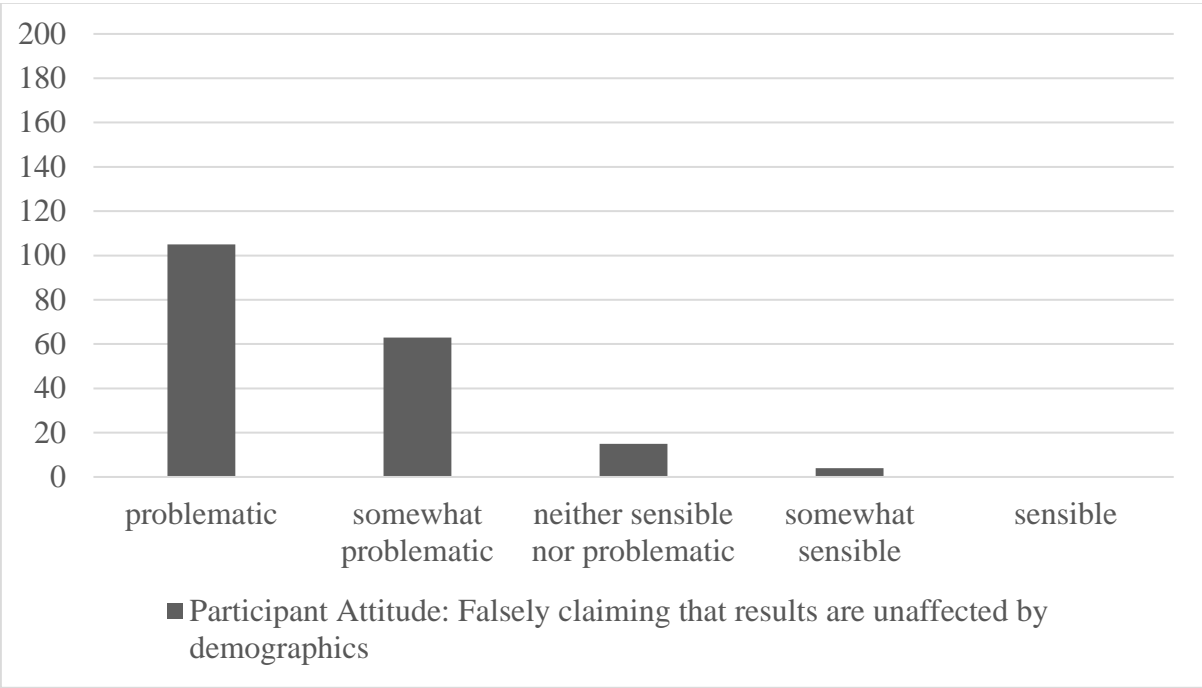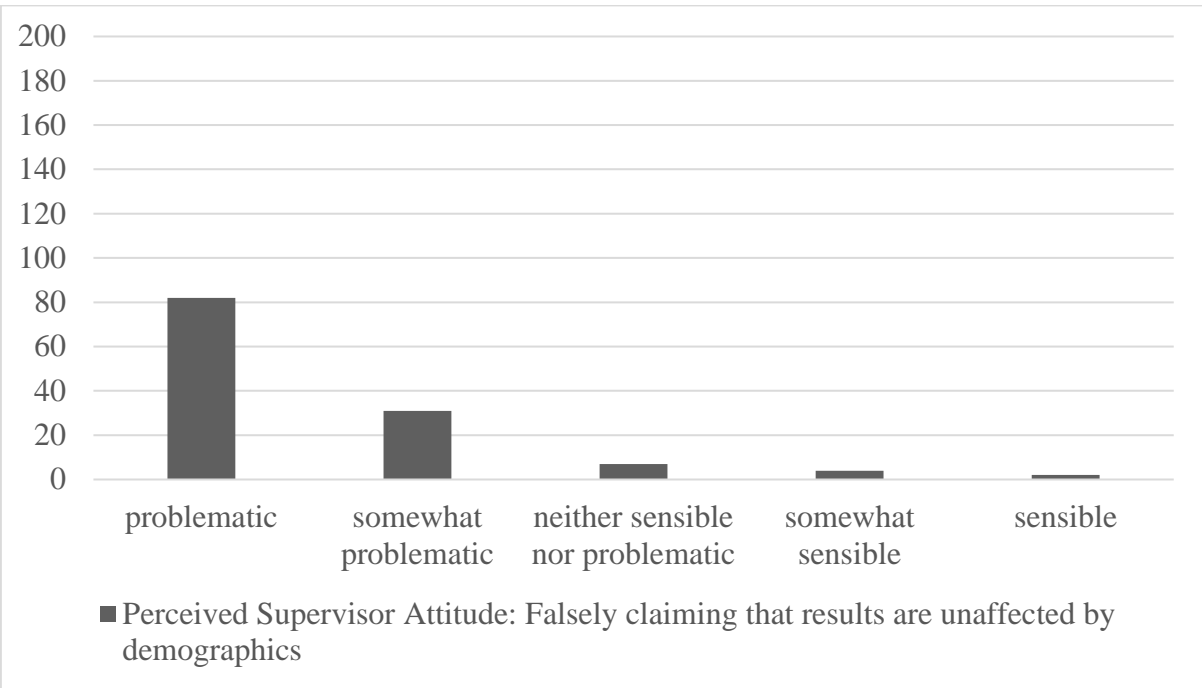

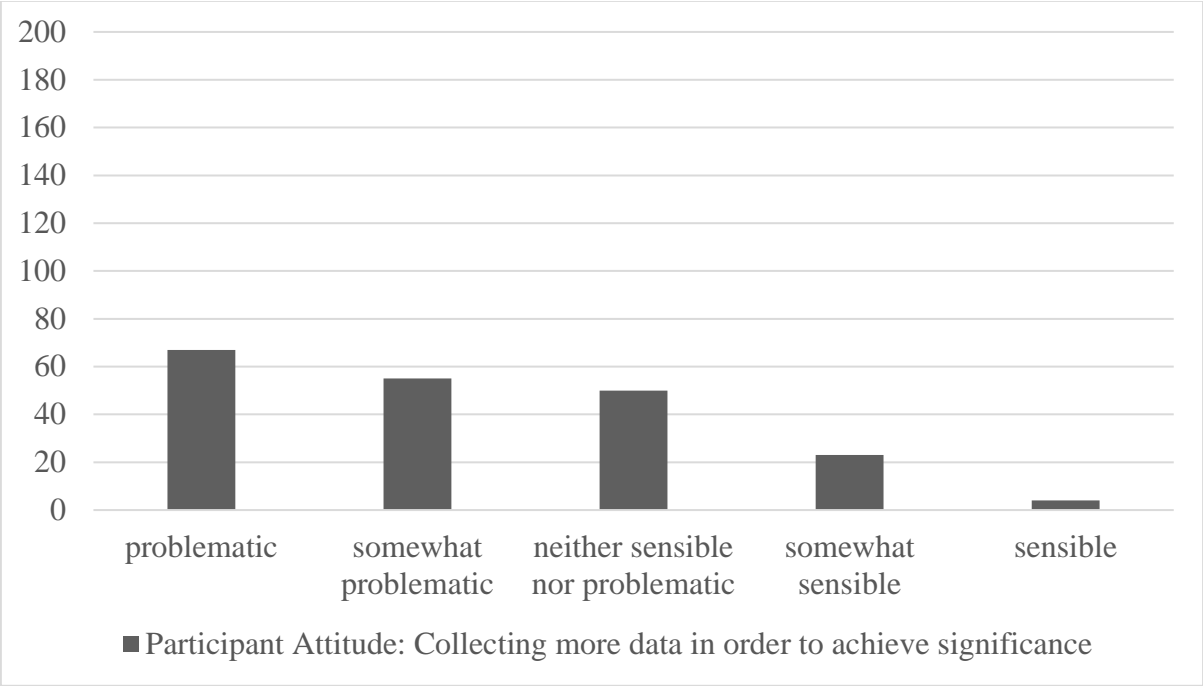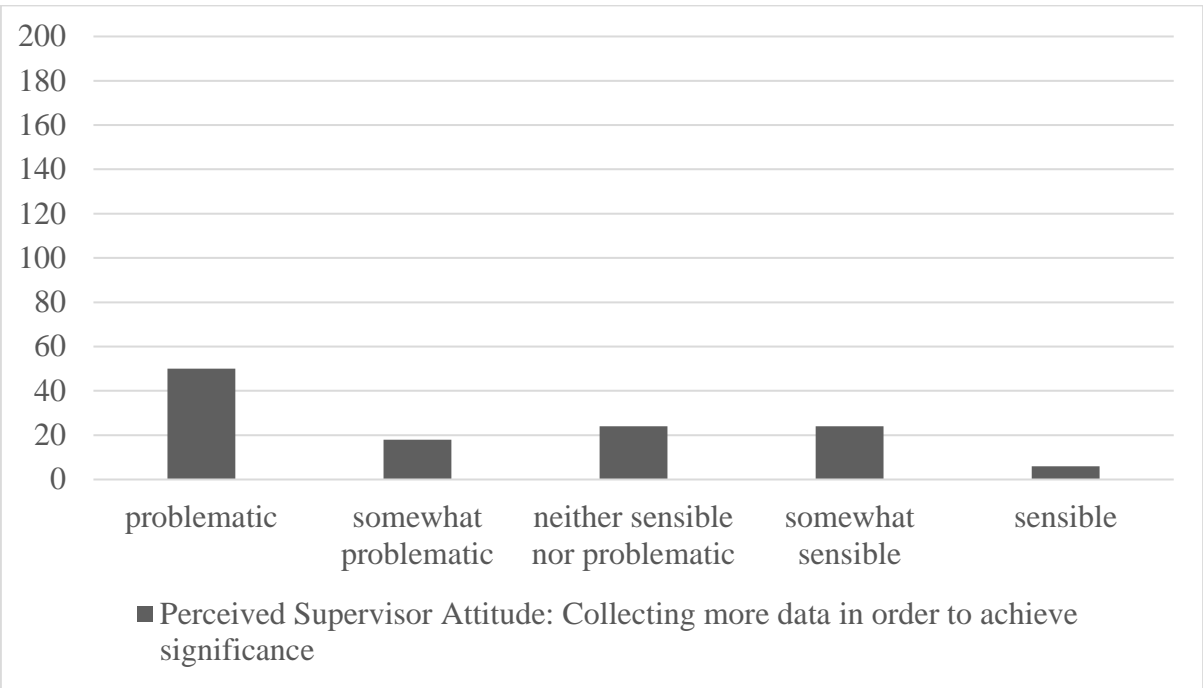

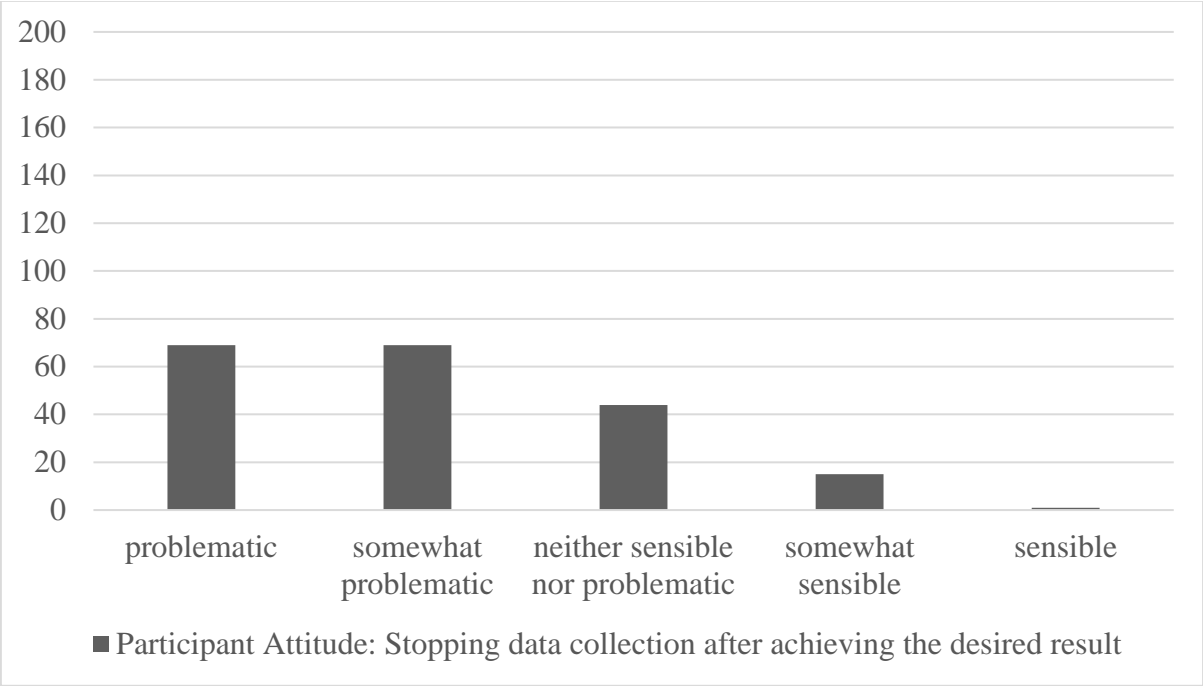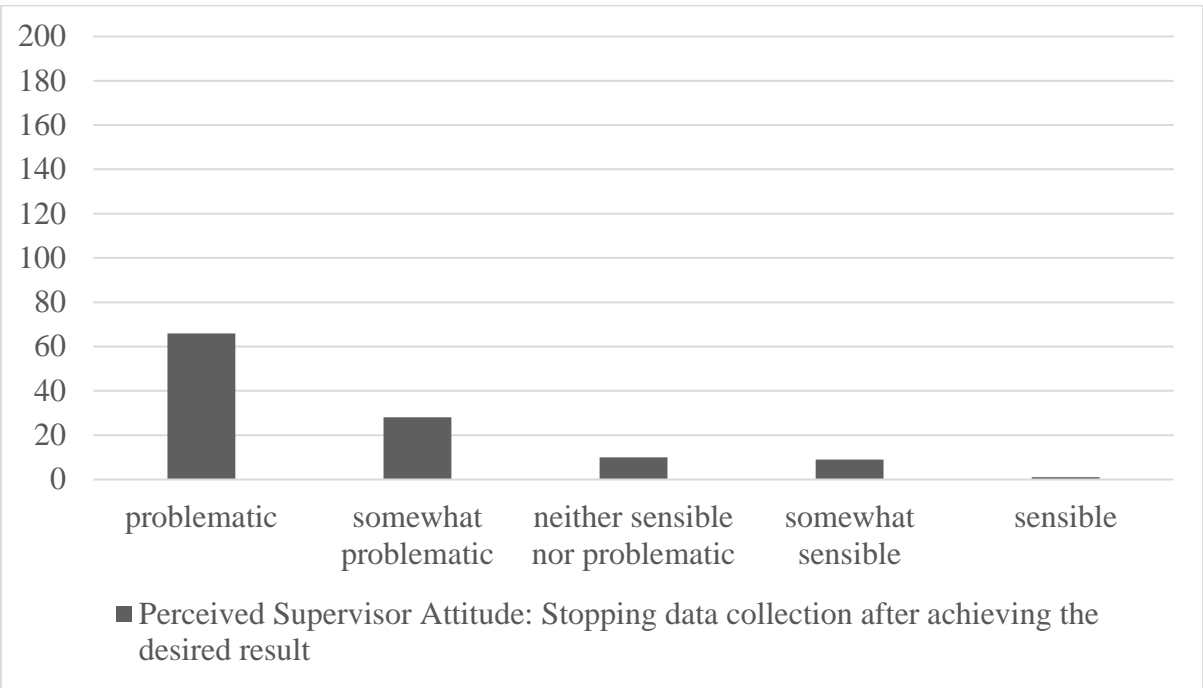

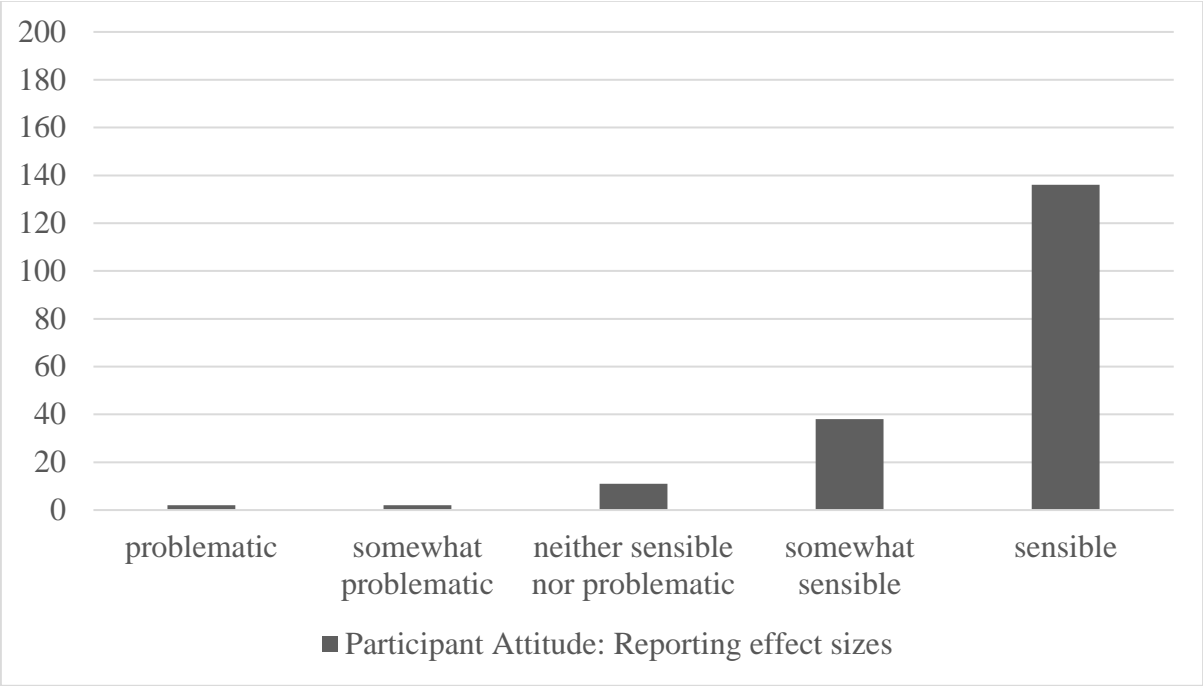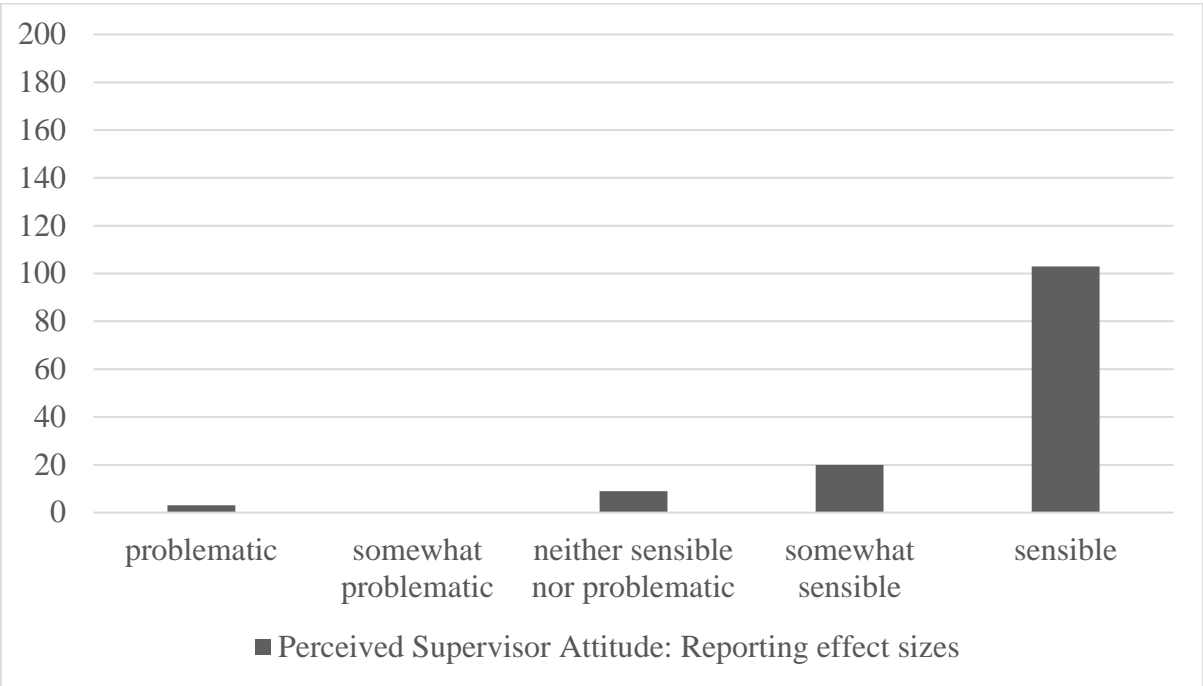

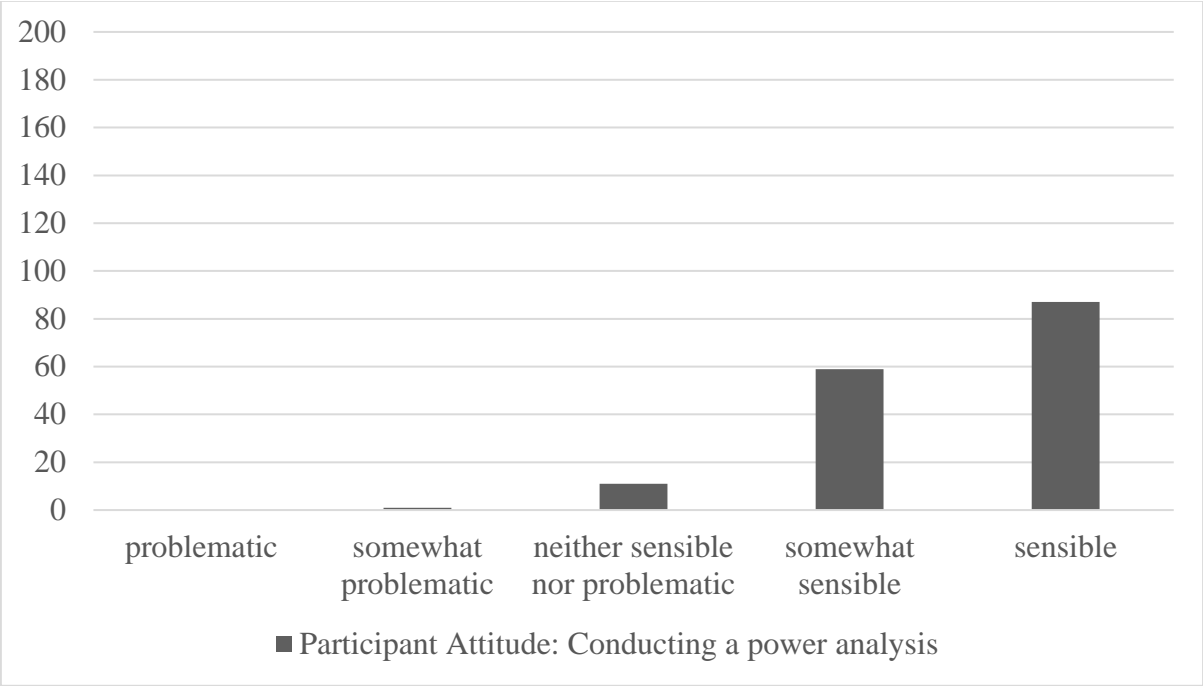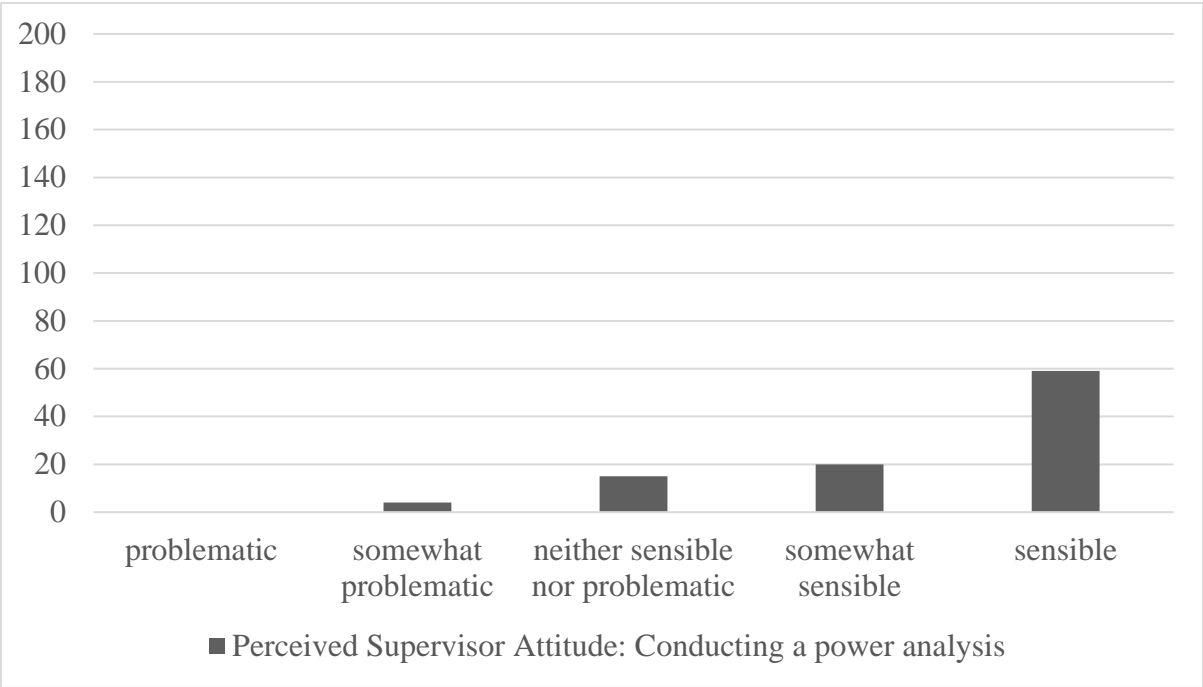

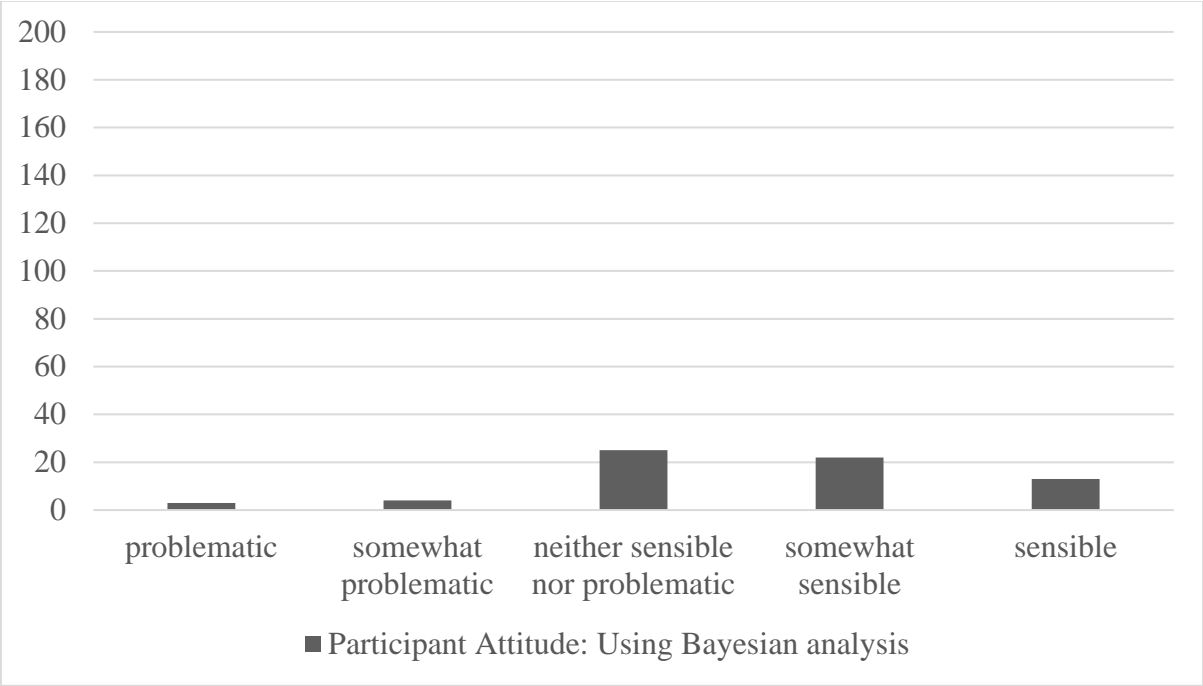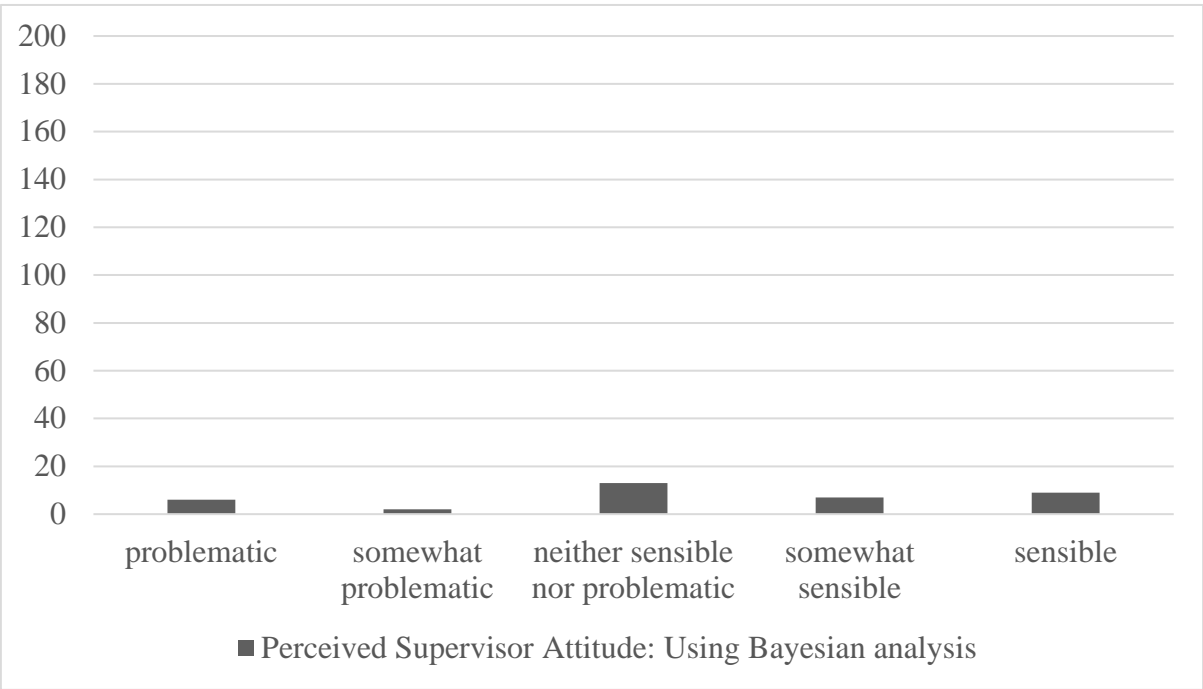

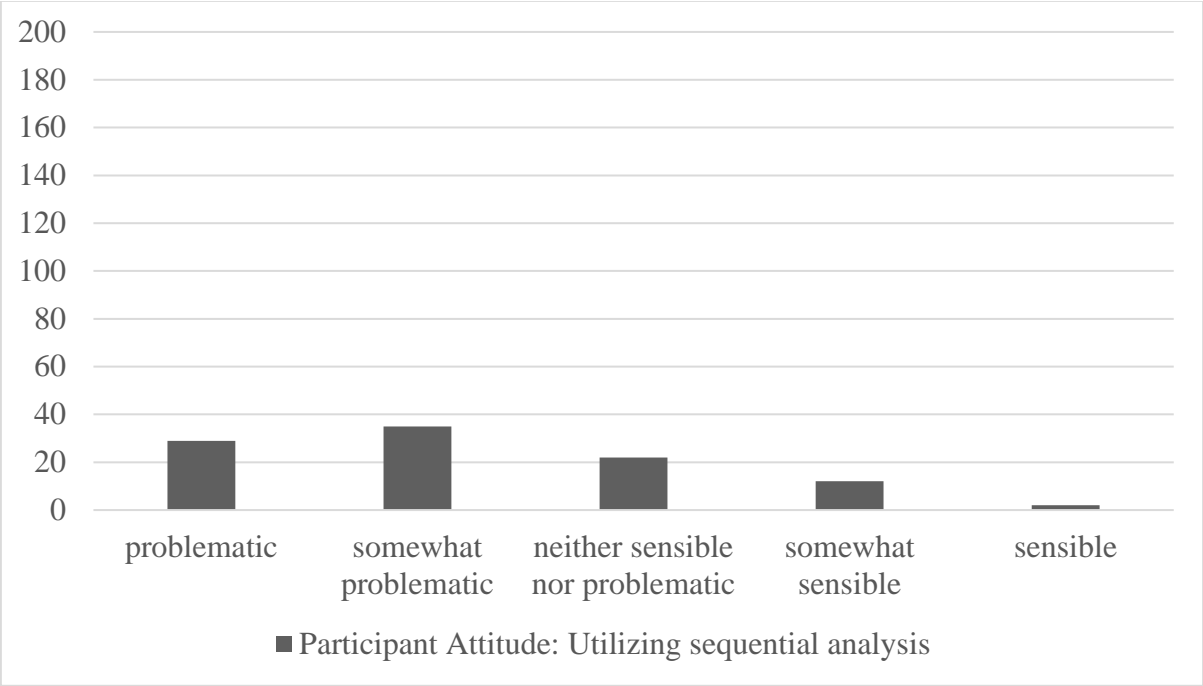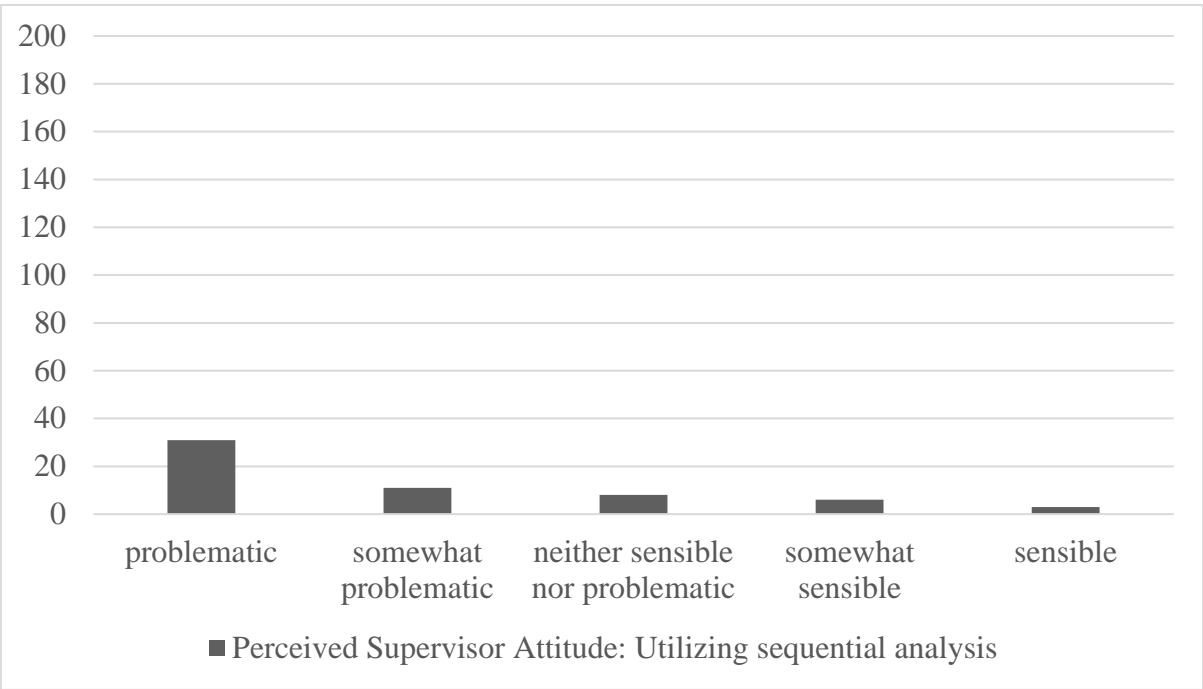

Supplement: pone.0203470.s004.pdf [file pone.0203470.s004.pdf]
